# Supplementary material
Source: publisher figshare collection journal article supplement (https://frontiersin.figshare.com/ndownloader/files/13627001)
Supplement: Supplementary file [file 13627001]

## Supplementary Material

### Morin protects channel catfish from *Aeromonas hydrophila* infection by blocking aerolysin activity

Jing Dong <sup>1,2</sup>, Yongtao Liu <sup>1,2</sup>, Ning Xu <sup>1,2</sup>, Qiuhong Yang <sup>1,2</sup>, Xiaohui Ai <sup>1,2\*</sup>

1 Yangtze River Fisheries Research Institute, Chinese Academy of Fishery Sciences, Wuhan 430223, China;

2 Key Laboratory of Control of Quality and Safety for Aquatic Products, Ministry of Agriculture, Beijing 100071, China.

\* **Correspondence:** Corresponding Author: aixh@yfi.ac.cn

## 1 Supplementary Figures and Tables

### 1.1 Supplementary Figures

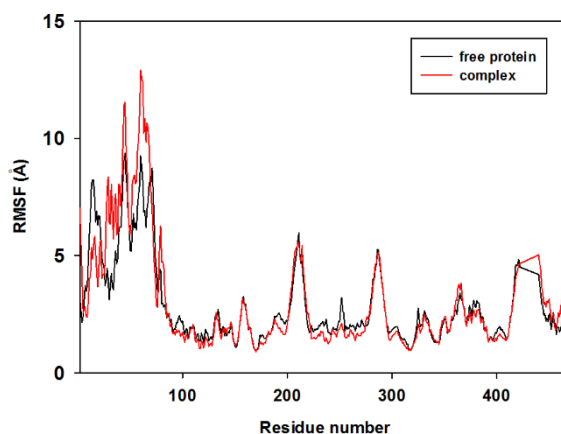

**Supplementary Figure 1.** The root-mean-square deviations (RMSDs) of all the atoms of pAerA-morin complex and free pAerA with respect to its initial structure as function of time.

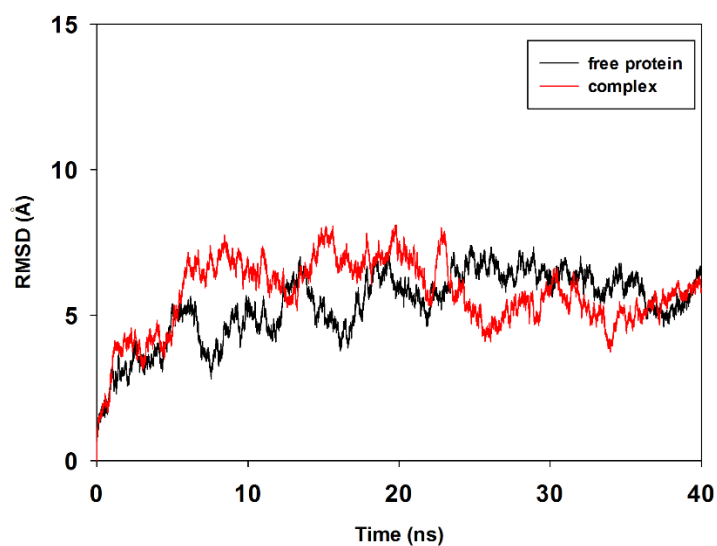

**Supplementary Figure 2.** RMSF of the residues of the whole protein in pAerA-morin complex and free pAerA during the 40 ns simulation.

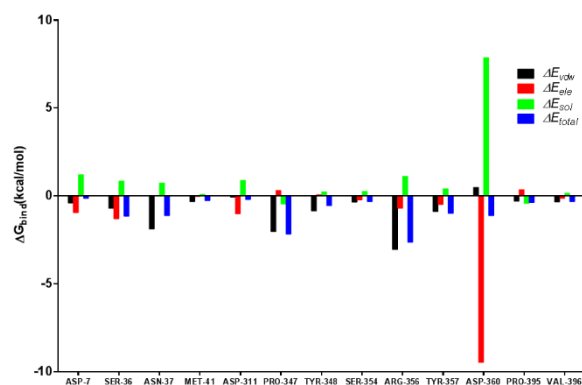

**Supplementary Figure 3.** Decomposition of the binding energy on a per-residue basis in the pAerA-morin complex.

## 1.2 Supplementary Tables

**Supplementary Table 1** Primer pairs used for the mutants

| Primer Name | Sequence                                        |
|-------------|-------------------------------------------------|
| R356A-F     | 5'-GGCGAGCAGCATTGCATACCAGTGGGAC-3'              |
| R356A-R     | 5'-GTCCCACTGGTATGCAATGCTGCTCGCC-3'              |
| P347A-F     | 5'-CCTTCGTCATCGGGGCGTACAAGGACAAG-3'             |
| P347A-R     | 5'-CTTGTCTTGTACGCCCCGATGACGAAGG-3'              |
| S36A-F      | 5'-GGAAGCCCAGAGCGTTAAAGCGAATATTGTCAATATGATGG-3' |
| S36A-R      | 5'-CCATCATATTGACAATATTCGCTTTAACGCTCTGGGCTTCC-3' |
